# Supplementary material for: Bioactive fish collagen peptides weaken intestinal inflammation by orienting colonic macrophages phenotype through mannose receptor activation
Source: Springer Nature journal article supplement (doi:10.1007/s00394-021-02787-7), 2022-01-08
Supplement: MOESM2 [file 20012414]

## TABLES

**Table 1. Amino acid composition of Naticol®Gut (Fish collagen peptides, Weishardt).**

| <b>Amino acid</b> | <b>Percentage of amino acid</b> |
|-------------------|---------------------------------|
| Glycine           | 20.9                            |
| Proline           | 12.6                            |
| Glutamic acid     | 11.6                            |
| Hydroxyproline    | 10.5                            |
| Arginine          | 8.9                             |
| Alanine           | 8.3                             |
| Aspartic acid     | 5.1                             |
| Lysine            | 3.5                             |
| Serine            | 3.5                             |
| Threonine         | 2.7                             |
| Leucine           | 2.6                             |
| Phenylalanine     | 2.3                             |
| Valine            | 2.0                             |
| Isoleucine        | 1.5                             |
| Hydroxylysine     | 1.5                             |
| Histidine         | 1.3                             |
| Methionine        | 0.8                             |
| Tyrosine          | 0.4                             |
| Cysteine+cystine  | 0.03                            |
| Tryptophane       | Traces                          |

**Table 2. Murine primer sequences used in qPCR assay**

| <b>Gene</b>                    | <b>5'- 3'Sequences</b>                    |
|--------------------------------|-------------------------------------------|
| <i>Alox15</i>                  | Sense CAG-GCA-TCG-GAG-TAC-AGG-TT          |
|                                | Antisense GAT-TGT-GCC-ATC-CTT-CCA-GT      |
| <i>Arginase1</i>               | Sense CGT-GTA-CAT-TGG-CTT-GCG-AG          |
|                                | Antisense TCG-GCC-TTT-TCT-TCC-TTC-CC      |
| <i>Ccl2</i>                    | Sense AGG-TCC-CTG-TCA-TGC-TTC-TG          |
|                                | Antisense TCT-GGA-CCC-ATT-CCT-TCT-TG      |
| <i>Ccl22</i>                   | Sense GTC-CTA-GGG-AGG-AGG-ACC-TG          |
|                                | Antisense GAA-GGG-GGA-TAA-GCT-GGA-AG      |
| <i>Ccr2</i>                    | Sense AGA-GAG-CTG-CAG-CAA-AAA-GG          |
|                                | Antisense GGA-AAG-AGG-CAG-TTG-CAA-AG      |
| <i>Fgcr3a</i>                  | Sense TGT-TTG-CTT-TTG-CAG-ACA-GG          |
|                                | Antisense TGC-TCC-ATT-TGA-CAC-CGA-TA      |
| <i>Cd209</i>                   | Sense GGC-ACG-AAA-GTG-AGG-CAC-AT          |
|                                | Antisense AGC-TCA-TCT-CCG-CTC-CTA-CCT     |
| <i>Fgcr2a</i>                  | Sense AGT-CCA-AGC-CTG-TCA-CCA-TC          |
|                                | Antisense CAG-TTT-TGG-CAG-CTT-CTT-CC      |
| <i>Cxcl9</i>                   | Sense CTG-GGG-TTA-AAG-GTG-TGT-GC          |
|                                | Antisense CTC-GTG-GCG-CTG-AAG-ATG-TC      |
| <i>Cxcl10</i>                  | Sense CTG-CAG-GAT-GAT-GGT-CAA-GC          |
|                                | Antisense CTG-AGC-TAG-GGA-GGA-CAA-GG      |
| <i>Gapdh</i>                   | Sense AAC-TTT-GGC-ATT-GTG-GAA-GG          |
|                                | Antisense ACA-CAT-TGG-GGG-TAG-GAA-CA      |
| <i>Il1<math>\beta</math></i>   | Sense CAA-CCA-ACA-AGT-GAT-ATT-CTC-GAT-G   |
|                                | Antisense GAT-CCA-CAC-TCT-CCA-GCT-GCA     |
| <i>Il10</i>                    | Sense CCA-AGC-CTT-ATC-GGA-AAT-GA          |
|                                | Antisense TTT-TCA-CAG-GGG-AGA-AAT-CG      |
| <i>Il6</i>                     | Sense GAG-GAT-ACC-ACT-CCC-AAC-AGA-CC      |
|                                | Antisense AAG-TGC-ATC-ATC-GTT-GTT-CAT-ACA |
| <i>Inos</i>                    | Sense TCC-TGG-ACA-TTA-CGA-CCC-CT          |
|                                | Antisense ACA-AGG-CCT-CCA-ATC-TCT-GC      |
| <i>Mrc1</i>                    | Sense ATG-CCA-AGT-GGG-AAA-ATC-TG          |
|                                | Antisense TGT-AGC-AGT-GGC-CTG-CAT-AG      |
| <i>Ncf1</i>                    | Sense AGT-GAT-GCG-GAG-ACT-TTG-CT          |
|                                | Antisense ACC-GGA-GTT-ACA-GGC-AAA-TG      |
| <i>Pgds</i>                    | Sense AGT-GGT-GGA-GGC-CAA-CTA-TG          |
|                                | Antisense CCA-GCC-CTC-TGA-CTG-ACT-TC      |
| <i>Pges</i>                    | Sense CCT-AGG-CTT-CAG-CCT-CAC-AC          |
|                                | Antisense CAG-CCT-ATT-GTT-CAG-CGA-CA      |
| <i>Ptgs2</i>                   | Sense AGA-AGG-AAA-TGG-CTG-CAG-AA          |
|                                | Antisense GCT-CGG-CTT-CCA-GTA-TTG-AG      |
| <i>Tgf-<math>\beta</math></i>  | Sense AGG-TTG-GCA-TTC-CAC-TTC-AC          |
|                                | Antisense AGG-GGC-CTC-TAA-GAG-CAG-TC      |
| <i>Thr-2</i>                   | Sense TGC-TTT-CCT-GCT-GGA-GAT-TT          |
|                                | Antisense TGT-AAC-GCA-ACA-GCT-TCA-GG      |
| <i>Tnf-<math>\alpha</math></i> | Sense AGC-CCC-CAG-TCT-GTA-TCC-TT          |
|                                | Antisense CTC-CCT-TTG-CAG-AAC-TCA-GG      |

**Table 3. Human primer sequences used in qPCR assay**

| <b>Gene</b>    | <b>Sequences 5' - 3'</b>             |
|----------------|--------------------------------------|
| <i>18SrRNA</i> | Sense AAA-CGG-CTACCA-CAT-CCA-AG      |
|                | Antisense CCT-CCA-ATG-GAT-CCT-CGT-TA |
| <i>Cd209</i>   | Sense TGG-CTA-TAC-CTG-GGG-ACT-TG     |
|                | Antisense AGG-AAT-CCA-AGG-GGC-TAA-GA |
| <i>Ccr2</i>    | Sense TGG-CTG-TGT-TTG-CTT-CTG-TC     |
|                | Antisense CCC-GAG-TAG-CAG-ATG-ACC-AT |
| <i>Fcgr3a</i>  | Sense TAC-AGC-GTG-GAG-AAG-GA         |
|                | Antisense GCA-CCT-GTA-CTC-TCC-ACT    |
| <i>Mrc1</i>    | Sense GGC-GGT-GAC-CTC-ACA-AGT-AT     |
|                | Antisense ACG-AAG-CCA-TTT-GGT-AAA-CG |
| <i>Ptgs2</i>   | Sense CAT-GTG-AGT-CCC-TGT-GAT-GG     |
|                | Antisense GAC-TGC-AGC-AAA-GAC-ATC    |

**Table 4. Sequences used in microbiota PCR assay**

| <b>Gene/ Phyla/Family/Genus/Specie</b> | <b>Sequences 5' - 3'</b>                    |
|----------------------------------------|---------------------------------------------|
| <i>B-actin</i>                         | Sense GGA-CTT-CGA-GCA-AGA-GAT-GG            |
|                                        | Antisense AGC-ACT-GTG-TTG-GCG-TAC-AG        |
| Total bacteria                         | Sense ACT-CCT-ACG-GGA-GGC-AGC-AG            |
|                                        | Antisense ATT-ACC-GCG-GCT-GCT-GG            |
| Bacteroidetes                          | Sense GGA-RCA-TGT-GGT-TTA-ATT-CGA-TGA-T     |
|                                        | Antisense AGC-TGA-CGA-CAA-CCA-TGC-AG        |
| Enterobacteria                         | Sense GTG-CCA-GCM-GCC-GCG-GTA-A             |
|                                        | Antisense GCC-TCA-AGG-GCA-CAA-CCT-CCA-AG    |
| <i>E. coli</i>                         | Sense GTT-AAT-ACC-TTT-GCT-CAT-TGA           |
|                                        | Antisense ACC-AGG-GTA-TCT-AAT-CCT-GTT       |
| Firmicutes                             | Sense AGC-TGA-CGA-CAA-CCA-TGC-AC            |
|                                        | Antisense GGA-GYA-TGT-GGT-TTA-ATT-CGA-AGC-A |
| <i>L. murinus</i>                      | Sense TCG-AAC-GAA-ACT-TCT-TTA-TCA-CC        |
|                                        | Antisense CGT-TCG-CCA-CTC-AAC-TCT-TT        |
| <i>F.prausnitzii</i>                   | Sense GAT-GGC-CTC-GCG-TCC-GAT-TAG           |
|                                        | Antisense CCG-AAG-ACC-TTC-TTC-CTC-C         |
| Fungi                                  | Sense CTT-GGT-CAT-TTA-GAG-GAA-GTA-A         |
|                                        | Antisense GCT-GCG-TTC-TTC-ATC-GAT-GC        |
| <i>Candida spp.</i>                    | Sense TCG-CAT-CGA-TGA-AGA-ACG-CAG-C         |
|                                        | Antisense TCT-TTT-CCT-CCG-CTT-ATT-GAT-ATG-C |
| <i>C. albicans</i>                     | Sense ATT-GCT-TGC-GGC-GGT-AAC-GTC-C         |
|                                        | Antisense TCT-TTT-CCT-CCG-CTT-ATT-GAT-ATG-C |
| <i>S. cerevisiae</i>                   | Sense AGG-AGT-GCG-GTT-CTT-IG                |
|                                        | Antisense TAC-TTA-CCG-AGG-CAA-GCT-ACA       |

**Table 5. Strain names and references of the *in vitro* cultivated microorganisms**

| <b>Strain name</b>              | <b>Number</b> |
|---------------------------------|---------------|
| <i>Candida albicans</i>         | ATCC-14053    |
| <i>Saccharomyces cerevisiae</i> | DSM-70449     |
| <i>Escherichia coli</i>         | DSM-30083     |
| <i>Enterococcus faecalis</i>    | DSM-20478     |
| <i>Lactobacillus murinus</i>    | DSM-20452     |
